# Supplementary material
Source: publisher figshare collection journal article supplement (https://gsapubs.figshare.com/articles/dataset/_/19878280)
Supplement: Supplementary file 2 [file 1]

**Table S1.** Experimental charring data gathered by Scott and Glasspool (2005). Specimens were charred at durations ranging from 0.5 to 24 hrs and temperatures from 200 to 900 °C, from which the resulting mean random reflectance ( $R_o$  %) for each charring run was determined.

| <b>Duration of<br/>charring<br/>(hrs)</b> | <b>Experimental<br/>charring<br/>temp.<br/>(°C)</b> | <b>Mean<br/>Random<br/>Reflectance<br/>(<math>R_o</math> %)</b> |
|-------------------------------------------|-----------------------------------------------------|-----------------------------------------------------------------|
| 0.5                                       | 200                                                 | 0.00                                                            |
| 1                                         | 200                                                 | 0.00                                                            |
| 2                                         | 200                                                 | 0.00                                                            |
| 4                                         | 200                                                 | 0.00                                                            |
| 24                                        | 200                                                 | 0.00                                                            |
| 1                                         | 275                                                 | 0.10                                                            |
| 24                                        | 275                                                 | 0.40                                                            |
| 0.5                                       | 300                                                 | 0.10                                                            |
| 1                                         | 300                                                 | 0.27                                                            |
| 4                                         | 300                                                 | 0.34                                                            |
| 2                                         | 300                                                 | 0.35                                                            |
| 24                                        | 300                                                 | 0.42                                                            |
| 1                                         | 325                                                 | 0.55                                                            |
| 1                                         | 350                                                 | 1.00                                                            |
| 0.5                                       | 400                                                 | 1.11                                                            |
| 2                                         | 400                                                 | 1.19                                                            |
| 1                                         | 400                                                 | 1.22                                                            |
| 4                                         | 400                                                 | 1.27                                                            |
| 24                                        | 400                                                 | 1.51                                                            |
| 1                                         | 450                                                 | 1.45                                                            |
| 0.5                                       | 500                                                 | 2.14                                                            |
| 2                                         | 500                                                 | 2.25                                                            |
| 1                                         | 500                                                 | 2.27                                                            |
| 4                                         | 500                                                 | 2.75                                                            |
| 24                                        | 500                                                 | 3.17                                                            |
| 1                                         | 550                                                 | 2.78                                                            |
| 1                                         | 600                                                 | 3.87                                                            |
| 4                                         | 600                                                 | 3.95                                                            |
| 24                                        | 600                                                 | 4.73                                                            |
| 24                                        | 900                                                 | 6.52                                                            |

**Table S2.** Experimental charring data gathered by Scott and Glasspool (2007). Specimens of the bracket fungus (*Ganoderma*) were charred for 1 hour at temperatures between 300 and 600 °C and the resulting mean random reflectance (R<sub>o</sub> %) for each charring run determined.

| Experimental charring temp. (°C) | Mean Random Reflectance (R <sub>o</sub> %) |
|----------------------------------|--------------------------------------------|
| 300                              | 0.00                                       |
| 350                              | 0.45                                       |
| 400                              | 0.85                                       |
| 450                              | 1.45                                       |
| 500                              | 1.97                                       |
| 550                              | 2.32                                       |
| 600                              | 2.93                                       |

**Table S3.** Hudspith et al. (2014) 1 hr hold-duration experimental charring calibration data. *N.B. Hudspith et al. (2014) only presented the raw data in chart format. However, the calibration equation as presented could not be used to calculate temperature of formation from mean random reflectance. To permit these data to be used for the calculation of temperature, Glasspool precisely measured the points and replotted them in Excel (herein shown as measured).*

| Hudspith et al. (2014) Experimental charring temps. (°C) | Reflectance, as measured by Glasspool from Hudspith et al. (2014, Fig. 1) (R <sub>o</sub> %) |
|----------------------------------------------------------|----------------------------------------------------------------------------------------------|
| 800                                                      | 4.800                                                                                        |
| 700                                                      | 4.450                                                                                        |
| 600                                                      | 2.710                                                                                        |
| 500                                                      | 1.820                                                                                        |
| 400                                                      | 0.726                                                                                        |
| 300                                                      | 0.162                                                                                        |

**Table S4.** Application of calibration equations to nominal reflectance values (Ro = 0.25-6.5%) to permit an assessment of their impact on temperature estimates. *Within the column headers, Max = the maximum experimental charring temperature used for each run, and Ro % the maximum mean random reflectance measured. Data in **bold** correspond to values beyond the calibration ranges.*

| Nominal assigned reflectance value | Scott & Glasspool (2005) Composite<br><b>Equation 1</b>                           | Scott & Glasspool (2007) <i>Ganoderma</i><br><b>Equation 2</b> | Scott & Glasspool (2005) 1 hr<br><b>Equation 3</b> | Scott & Glasspool (2005) 24 hr<br><b>Equation 4</b> | Hudspith et al. (2014) 1 hr<br><b>Equation 7</b> |
|------------------------------------|-----------------------------------------------------------------------------------|----------------------------------------------------------------|----------------------------------------------------|-----------------------------------------------------|--------------------------------------------------|
| Ro %                               | Max 900°C/Ro 6.52%                                                                | Max 600°C/Ro 2.93%                                             | Max 600°C/Ro 3.87%                                 | Max 900°C/Ro 6.52%                                  | Max 800°C/Ro 4.80%                               |
|                                    | Calculated Temperatures (°C) from the application of <b>Equations 1-4 &amp; 7</b> |                                                                |                                                    |                                                     |                                                  |
| 0.25                               | 269                                                                               | 329                                                            | 274                                                | 254                                                 | 316                                              |
| 0.50                               | 312                                                                               | 357                                                            | 309                                                | 294                                                 | 363                                              |
| 0.75                               | 349                                                                               | 383                                                            | 342                                                | 329                                                 | 402                                              |
| 1.00                               | 382                                                                               | 409                                                            | 373                                                | 359                                                 | 436                                              |
| 1.50                               | 435                                                                               | 460                                                            | 430                                                | 406                                                 | 491                                              |
| 2.00                               | 475                                                                               | 509                                                            | 479                                                | 442                                                 | 531                                              |
| 2.50                               | 505                                                                               | 559                                                            | 521                                                | 469                                                 | 564                                              |
| 3.00                               | 530                                                                               | <b>609</b>                                                     | 557                                                | 491                                                 | 594                                              |
| 3.50                               | 554                                                                               | <b>662</b>                                                     | 585                                                | 515                                                 | 629                                              |
| 4.00                               | 580                                                                               | <b>719</b>                                                     | <b>607</b>                                         | 542                                                 | 674                                              |
| 4.50                               | 613                                                                               | <b>780</b>                                                     | <b>623</b>                                         | 578                                                 | 735                                              |
| 5.00                               | 657                                                                               | <b>847</b>                                                     | <b>633</b>                                         | 628                                                 | <b>817</b>                                       |
| 5.50                               | 715                                                                               | <b>921</b>                                                     | <b>637</b>                                         | 694                                                 | <b>928</b>                                       |
| 6.00                               | 792                                                                               | <b>1003</b>                                                    | <b>636</b>                                         | 782                                                 | <b>1073</b>                                      |
| 6.50                               | 891                                                                               | <b>1094</b>                                                    | <b>629</b>                                         | 895                                                 | <b>1257</b>                                      |

**Table S5.** List of Rumney, Winnica, Ludford Lane & North Brown Clee Hill specimen morphotypes, their associated mean random reflectance ( $R_o\%$ ), recorded as an average of 100 data points (measured as pixels). Where less than 100 points were sampled, the number measured ( $n =$ ) is given next to the Id#. (Temp. °C w) is the fire temperature calculated from the  $R_o\%$  using **Equation 1** based upon modern woods. (Temp. °C g) is the fire temperature calculated from the  $R_o\%$  using **Equation 2** based upon the modern bracket fungus *Ganoderma*. Mean, min and max Temp. °C data are summarized in Table S6.

| RUMNEY DATA              |            |      |                          |                   |      |         |         |
|--------------------------|------------|------|--------------------------|-------------------|------|---------|---------|
| Vitrinite                |            |      | Inertinite               |                   |      | Temp °C | Temp °C |
| Id #                     | Morphology | Ro%  | Id #                     | Morphology        | Ro%  | w       | g       |
| R.314.316.3m.Strew-1     | UP         | 0.98 | R.316.3-317.39m.SEM2-26  | UP                | 1.27 | 410     | 440     |
| R.314.316.3m.Strew-3     | UP         | 1.02 | R.316.3-317.39m.SEM2-17  | UP                | 1.28 | 410     | 440     |
| R.316.3-317.39m.Strew-13 | UP         | 1.02 | R.316.3-317.39m.Strew-16 | UP                | 1.29 | 410     | 440     |
| R.316.3-317.39m.Strew-2a | UP         | 1.03 | R.316.3-317.39m.Insitu-3 | UP                | 1.36 | 420     | 450     |
| R.316.3-317.39m.SEM2-16c | UP         | 1.03 | R.316.3-317.39m.SEM2-1   | Nematophyte       | 1.36 | 420     | 450     |
| R.316.3-317.39m.Strew-7  | UP         | 1.06 | R.316.3-317.39m.SEM1-6   | <i>Pachytheca</i> | 1.44 | 430     | 450     |
| R.316.3-317.39m.SEM2-13  | UP         | 1.06 | R.316.3-317.39m.SEM2-3   | Prototaxodioid    | 1.49 | 430     | 460     |
| R.316.3-317.39m.Strew-6  | UP         | 1.06 | R.316.3-317.39m.SEM2-14  | UP                | 1.52 | 440     | 460     |
| R.314.316.3m.Strew-2     | UP         | 1.07 | R.316.3-317.39m.SEM2-18  | Coprolite         | 1.54 | 440     | 460     |
| R.316.3-317.39m.Strew-12 | UP         | 1.08 | R.316.3-317.39m.SEM1-7   | <i>Pachytheca</i> | 1.54 | 440     | 460     |
| R.314.316.3m.Strew-5     | UP         | 1.08 | R.316.3-317.39m.SEM1-4   | Prototaxodioid    | 1.6  | 440     | 470     |
| R.316.3-317.39m.Strew-5  | UP         | 1.09 | R.316.3-317.39m.Strew-14 | Prototaxodioid    | 1.61 | 440     | 470     |
| R.316.3-317.39m.Insitu-2 | UP         | 1.11 | R.316.3-317.39m.Strew-15 | UP                | 1.67 | 450     | 480     |
| R.314.316.3m.Strew-4     | UP         | 1.11 | R.316.3-317.39m.SEM2-12  | Nematophyte       | 1.67 | 450     | 480     |
| R.316.3-317.39m.Strew-18 | UP         | 1.11 | R.316.3-317.39m.Strew-19 | <i>Pachytheca</i> | 1.67 | 450     | 480     |
| R.314.316.3m.Strew-8     | UP         | 1.13 | R.316.3-317.39m.SEM2-25  | Nematophyte       | 1.69 | 450     | 480     |
| R.316.3-317.39m.Strew-9  | UP         | 1.14 | R.316.3-317.39m.SEM2-24  | UP                | 1.7  | 450     | 480     |
| R.314.316.3m.Strew-7     | UP         | 1.14 | R.316.3-317.39m.SEM1-3   | Prototaxodioid    | 1.71 | 450     | 480     |
| R.314.316.3m.Strew-6     | UP         | 1.15 | R.316.3-317.39m.SEM2-21  | Prototaxodioid    | 1.74 | 460     | 480     |
| R.316.3-317.39m.SEM2-7   | UP         | 1.16 | R.316.3-317.39m.SEM2-19  | <i>Pachytheca</i> | 1.77 | 460     | 490     |
| R.316.3-317.39m.Strew-21 | UP         | 1.17 | R.316.3-317.39m.SEM2-20  | Prototaxodioid    | 1.77 | 460     | 490     |
| R.316.3-317.39m.Strew-10 | UP         | 1.18 | R.316.3-317.39m.SEM2-16b | UP                | 1.8  | 460     | 490     |

|                         |                   |                        |                            |                   |                        |                |          |
|-------------------------|-------------------|------------------------|----------------------------|-------------------|------------------------|----------------|----------|
| R.316.3-317.39m.Strew-4 | UP                | 1.22                   | R.316.3-317.39m.SEM2-4     | Nematophyte       | 1.82                   | 460            | 490      |
|                         |                   |                        | R.316.3-317.39m.Strew-17   | Prototaxodioid    | 1.82                   | 460            | 490      |
|                         |                   |                        | R.316.3-317.39m.SEM2-8     | UP                | 1.84                   | 460            | 490      |
|                         |                   |                        | R.316.3-317.39m.Strew-3    | Nematophyte       | 1.85                   | 460            | 490      |
|                         |                   |                        | R.316.3-317.39m.Strew-8    | Nematophyte       | 1.89                   | 470            | 500      |
|                         |                   |                        | R.316.3-317.39m.SEM2-22    | Nematophyte       | 2.01                   | 480            | 510      |
|                         |                   |                        | R.316.3-317.39m.SEM2-2     | Prototaxodioid    | 2.02                   | 480            | 510      |
|                         |                   |                        | R.316.3-317.39m.SEM2-16a   | UP                | 2.05                   | 480            | 510      |
|                         |                   |                        | R.316.3-317.39m.SEM2-9     | Prototaxodioid    | 2.14                   | 480            | 520      |
|                         |                   |                        | R.316.3-317.39m.SEM2-11    | Prototaxodioid    | 2.16                   | 490            | 530      |
|                         |                   |                        | R.316.3-317.39m.SEM1-12    | UP                | 2.17                   | 490            | 530      |
|                         |                   |                        | R.316.3-317.39m.Strew-22   | Nematophyte       | 2.32                   | 490            | 540      |
|                         |                   |                        | R.316.3-317.39m.SEM1-11    | Prototaxodioid    | 2.33                   | 500            | 540      |
|                         |                   |                        | R.316.3-317.39m.Strew-11   | Nematophyte       | 2.37                   | 500            | 550      |
|                         |                   |                        | R.316.3-317.39m.Strew-1    | Nematophyte       | 2.41                   | 500            | 550      |
|                         |                   |                        | R.316.3-317.39m.SEM2-15    | Prototaxodioid    | 2.57                   | 510            | 570      |
|                         |                   |                        | R.316-317m.Insitu. 1 Inert | Prototaxodioid    | 2.82                   | 520            | 590      |
|                         |                   |                        | R.316.3-317.39m.SEM2-23    | <i>Pachythea</i>  | 3.36                   | 550            | 650      |
|                         |                   |                        | R.316.3-317.39m.SEM2-10    | <i>Pachythea</i>  | 3.68                   | 560            | 680      |
|                         |                   |                        | R.316.3-317.39m.SEM1-8     | Prototaxodioid    | 4                      | 580            | 720      |
|                         |                   |                        | R.316.3-317.39m.SEM2-3a    | UP                | 4.98                   | 650            | 840      |
|                         |                   |                        | R.316.3-317.39m.Strew-2    | UP                | 5.13                   | 670            | 870      |
|                         |                   |                        | R.316.3-317.39m.Strew-3a   | UP                | 5.36                   | 700            | 900      |
|                         |                   |                        | R.316.3-317.39m.SEM2-5     | Prototaxodioid    | 5.57                   | 720            | 930      |
|                         |                   |                        | R.316.3-317.39m.Strew-20   | UP                | 5.61                   | 730            | 940      |
| <b>WINNICA</b>          |                   |                        |                            |                   |                        |                |          |
| <b>Vitrinite</b>        |                   |                        | <b>Inertinite</b>          |                   |                        | <b>Temp °C</b> |          |
| <b>Id #</b>             | <b>Morphology</b> | <b>R<sub>o</sub> %</b> | <b>Id #</b>                | <b>Morphology</b> | <b>R<sub>o</sub> %</b> | <b>w</b>       | <b>g</b> |
| W.Strew-8               | UP                | 0.89                   | W.SEM-6                    | Nematothalloid    | 1.15                   | 400            | 420      |
| W.Strew-23              | UP                | 0.92                   | W.SEM-1                    | Coprolite         | 1.17                   | 400            | 430      |
| W.Strew-71              | UP                | 0.96                   | W.Strew-10                 | UP                | 1.19                   | 400            | 430      |
| W.Strew-22              | UP                | 0.97                   | W.Strew-14 (n=77)          | Nematophyte       | 1.28                   | 410            | 440      |
|                         |                   |                        | W.Strew-42                 | UP                | 1.29                   | 410            | 440      |

| <b>Id #</b> | <b>Samples not studied in Reflected Light</b> | W.SEM-14           | Nematophyte     | 1.37 | 420 | 450 |
|-------------|-----------------------------------------------|--------------------|-----------------|------|-----|-----|
| W.SEM-17    | Coprolite                                     | W.Strew-38         | UP              | 1.38 | 420 | 450 |
| W.SEM-18    | Coprolite                                     | W.Strew-46 (n=82)  | UP              | 1.38 | 420 | 450 |
| W.SEM-19    | Cryptophyte                                   | W.Strew-58 (n=59)  | UP              | 1.38 | 420 | 450 |
| W.SEM-20    | Nematophyte                                   | W.Strew-47         | Nematothalloid? | 1.39 | 420 | 450 |
| W.SEM-21    | Nematophyte                                   | W.Strew-50         | UP              | 1.4  | 430 | 450 |
| W.SEM-22    | Nematophyte                                   | W.Strew-51         | UP              | 1.41 | 430 | 450 |
| W.SEM-23    | Nematophyte                                   | W.Strew-52         | UP              | 1.41 | 430 | 450 |
| W.SEM-24    | Nematophyte                                   | W.Strew-69         | UP              | 1.42 | 430 | 450 |
| W.SEM-25    | Missing                                       | W.Strew-19         | Nematophyte     | 1.44 | 430 | 450 |
| W.SEM-26    | Nematophyte                                   | W.Strew-43         | UP              | 1.44 | 430 | 450 |
| W.SEM-27    | Nematophyte                                   | W.Strew-53         | Nematothalloid  | 1.44 | 430 | 450 |
| W.SEM-28    | Arthropod                                     | W.Strew-7          | Nematophyte     | 1.44 | 430 | 450 |
| W.SEM-29    | Nematophyte                                   | W.Strew-60 (n=67)  | Nematophyte     | 1.45 | 430 | 450 |
| W.SEM-30    | Coprolite                                     | W.Strew-16         | UP              | 1.46 | 430 | 460 |
| W.SEM-31    | UP                                            | W.Strew-68         | UP              | 1.46 | 430 | 460 |
| W.SEM-32    | UP                                            | W.Strew-70 (n= 66) | UP              | 1.46 | 430 | 460 |
| W.SEM-33    | UP                                            | W.Strew-67 (n= 67) | Nematophyte     | 1.47 | 430 | 460 |
| W.SEM-34    | Arthropod                                     | W.Strew-12 (n=65)  | Nematophyte     | 1.48 | 430 | 460 |
| W.SEM-35    | UP                                            | W.Strew-48 (n=87)  | Prototaxodioid? | 1.48 | 430 | 460 |
| W.SEM-36    | UP                                            | W.Strew-49         | UP              | 1.5  | 430 | 460 |
| W.SEM-37    | Nematophyte                                   | W.Strew-5          | UP              | 1.53 | 440 | 460 |
| W.SEM-38    | Nematophyte                                   | W.Strew-62 (n= 62) | UP              | 1.53 | 440 | 460 |
| W.SEM-39    | UP                                            | W.Strew-17         | Prototaxodioid? | 1.54 | 440 | 460 |
| W.SEM-40    | Nematophyte                                   | W.Strew-23         | Nematothalloid  | 1.54 | 440 | 460 |
| W.SEM-41    | Nematophyte                                   | W.Strew-21         | UP              | 1.55 | 440 | 460 |
| W.SEM-42    | Nematophyte                                   | W.Strew-1 (n=88)   | Nematophyte     | 1.6  | 440 | 470 |
| W.SEM-43    | UP                                            | W.Strew-63 (n=51)  | UP              | 1.6  | 440 | 470 |
| W.SEM-44    | Nematophyte                                   | W.Strew-27         | UP              | 1.61 | 440 | 470 |
| W.SEM-45    | Nematophyte                                   | W.Strew-64         | UP              | 1.61 | 440 | 470 |
| W.SEM-46    | Char                                          | W.Strew-31 (n= 74) | Prototaxodioid? | 1.63 | 450 | 470 |
| W.SEM-47    | Nematophyte                                   | W.Strew-36         | Nematophyte     | 1.65 | 450 | 470 |

|  |                    |                 |      |     |     |
|--|--------------------|-----------------|------|-----|-----|
|  | W.Strew-39         | UP              | 1.65 | 450 | 470 |
|  | W.Strew-33         | UP              | 1.66 | 450 | 480 |
|  | W.Strew-57         | Nematophyte     | 1.66 | 450 | 480 |
|  | W.Strew-35         | UP              | 1.68 | 450 | 480 |
|  | W.Strew-65         | UP              | 1.7  | 450 | 480 |
|  | W.Strew-45         | Nemtothalloid   | 1.74 | 460 | 480 |
|  | W.Strew-44         | UP              | 1.76 | 460 | 490 |
|  | W.Strew-22         | Nematothalloid  | 1.79 | 460 | 490 |
|  | W.SEM-2            | Embryophyte?    | 1.8  | 460 | 490 |
|  | W.Strew-40         | UP              | 1.81 | 460 | 490 |
|  | W.Strew-13         | Prototaxodioid  | 1.86 | 460 | 500 |
|  | W.SEM-16           | Prototaxodioid  | 1.89 | 470 | 500 |
|  | W.Strew-26         | Prototaxodioid? | 1.91 | 470 | 500 |
|  | W.Strew-28         | UP              | 2    | 470 | 510 |
|  | W.Strew-55         | Prototaxodioid  | 2.04 | 480 | 510 |
|  | W.Strew-18         | UP              | 2.07 | 480 | 520 |
|  | W.Strew-4          | UP              | 2.07 | 480 | 520 |
|  | W.Strew-9          | Nematophyte     | 2.07 | 480 | 520 |
|  | W.SEM-4            | Prototaxodioid  | 2.1  | 480 | 520 |
|  | W.Strew-24         | UP              | 2.3  | 490 | 540 |
|  | W.SEM-8            | Char            | 2.39 | 500 | 550 |
|  | W.Strew-25         | UP              | 2.39 | 500 | 550 |
|  | W.Strew-3 (n= 58)  | UP              | 2.43 | 500 | 550 |
|  | W.Strew-32         | Prototaxodioid? | 2.43 | 500 | 550 |
|  | W.Strew-61         | UP              | 2.48 | 500 | 560 |
|  | W.Strew-30         | UP              | 2.56 | 510 | 560 |
|  | W.Strew-20         | Prototaxodioid  | 2.63 | 510 | 570 |
|  | W.SEM-5            | Embryophyte?    | 2.64 | 510 | 570 |
|  | W.Strew-37         | Nematophyte     | 2.75 | 520 | 580 |
|  | W.SEM-15           | Char            | 2.76 | 520 | 580 |
|  | W.SEM-10           | Nematothalloid  | 2.79 | 520 | 590 |
|  | W.SEM-9            | Prototaxodioid  | 3.01 | 530 | 610 |
|  | W.Strew-66 (n= 91) | UP              | 3.02 | 530 | 610 |

|                                                    |            |                  |                    |                |                  |         |     |
|----------------------------------------------------|------------|------------------|--------------------|----------------|------------------|---------|-----|
|                                                    | W.Strew-11 |                  | Prototaxodioid?    | 3.06           | 530              | 620     |     |
|                                                    | W.Strew-29 |                  | UP                 | 3.06           | 530              | 620     |     |
|                                                    | W.Strew-2  |                  | Prototaxodioid?    | 3.07           | 530              | 620     |     |
|                                                    | W.Strew-34 |                  | Nematophyte        | 3.13           | 540              | 620     |     |
|                                                    | W.Strew-15 |                  | Prototaxodioid?    | 3.17           | 540              | 630     |     |
|                                                    | W.SEM-7    |                  | Prototaxodioid     | 3.25           | 540              | 640     |     |
|                                                    | W.Strew-59 |                  | Prototaxodioid     | 3.65           | 560              | 680     |     |
|                                                    | W.Strew-56 |                  | Prototaxodioid     | 3.71           | 560              | 690     |     |
|                                                    | W.Strew-41 |                  | UP (detrital)      | 3.94           | 580              | 710     |     |
|                                                    | W.SEM-12   |                  | Prototaxodioid     | 3.95           | 580              | 710     |     |
|                                                    | W.Strew-54 |                  | UP (detrital)      | 4.74           | 630              | 810     |     |
|                                                    | W.SEM-11   |                  | Nematophyte (tube) | 4.78           | 640              | 820     |     |
| LUDFORD LANE (Data used in Glasspool et al., 2004) |            |                  |                    |                |                  |         |     |
| Vitrinite                                          |            |                  | Inertinite         |                |                  | Temp °C |     |
| Id #                                               | Morphology | R <sub>o</sub> % | Id #               | Morphology     | R <sub>o</sub> % | w       | g   |
|                                                    | UP         | 0.29             |                    | Rhyniophytoid  | 1.03             | 390     | 410 |
|                                                    | UP         | 0.4              |                    | Prototaxodioid | 1.05             | 390     | 410 |
|                                                    | UP         | 0.46             |                    | Rhyniophytoid  | 1.06             | 390     | 420 |
|                                                    |            | Rhyniophytoid    |                    | 1.06           | 390              | 420     |     |
|                                                    |            | Rhyniophytoid    |                    | 1.15           | 400              | 420     |     |
|                                                    |            | Rhyniophytoid    |                    | 1.19           | 400              | 430     |     |
|                                                    |            | Rhyniophytoid    |                    | 1.21           | 410              | 430     |     |
|                                                    |            | Rhyniophytoid    |                    | 1.22           | 410              | 430     |     |
|                                                    |            | Rhyniophytoid    |                    | 1.22           | 410              | 430     |     |
|                                                    |            | Rhyniophytoid    |                    | 1.30           | 420              | 440     |     |
|                                                    |            | Rhyniophytoid    |                    | 1.30           | 420              | 440     |     |
|                                                    |            | Rhyniophytoid    |                    | 1.32           | 420              | 440     |     |
|                                                    |            | Rhyniophytoid    |                    | 1.36           | 420              | 450     |     |
|                                                    |            | Rhyniophytoid    |                    | 1.37           | 420              | 450     |     |
|                                                    |            | Rhyniophytoid    |                    | 1.38           | 420              | 450     |     |
|                                                    |            | Rhyniophytoid    |                    | 1.38           | 420              | 450     |     |
|                                                    |            | Rhyniophytoid    |                    | 1.39           | 420              | 450     |     |



|  |  |                |      |     |     |
|--|--|----------------|------|-----|-----|
|  |  | Rhyniophytoid  | 1.39 | 420 | 450 |
|  |  | Rhyniophytoid  | 1.39 | 420 | 450 |
|  |  | Rhyniophytoid  | 1.40 | 430 | 450 |
|  |  | Rhyniophytoid  | 1.45 | 430 | 450 |
|  |  | Rhyniophytoid  | 1.47 | 430 | 460 |
|  |  | Rhyniophytoid  | 1.47 | 430 | 460 |
|  |  | Rhyniophytoid  | 1.48 | 430 | 460 |
|  |  | Rhyniophytoid  | 1.48 | 430 | 460 |
|  |  | Rhyniophytoid  | 1.50 | 430 | 460 |
|  |  | Rhyniophytoid  | 1.54 | 440 | 460 |
|  |  | Rhyniophytoid  | 1.60 | 440 | 470 |
|  |  | Rhyniophytoid  | 1.70 | 450 | 480 |
|  |  | Rhyniophytoid  | 1.71 | 450 | 480 |
|  |  | Rhyniophytoid  | 1.72 | 450 | 480 |
|  |  | Rhyniophytoid  | 1.72 | 450 | 480 |
|  |  | Rhyniophytoid  | 1.76 | 460 | 490 |
|  |  | Rhyniophytoid  | 1.79 | 460 | 490 |
|  |  | Rhyniophytoid  | 1.80 | 460 | 490 |
|  |  | Rhyniophytoid  | 1.84 | 460 | 490 |
|  |  | Rhyniophytoid  | 1.87 | 470 | 500 |
|  |  | Rhyniophytoid  | 1.87 | 470 | 500 |
|  |  | Rhyniophytoid  | 1.88 | 470 | 500 |
|  |  | Rhyniophytoid  | 1.94 | 470 | 500 |
|  |  | Rhyniophytoid  | 1.94 | 470 | 500 |
|  |  | Rhyniophytoid  | 1.99 | 470 | 510 |
|  |  | Rhyniophytoid  | 2.01 | 480 | 510 |
|  |  | Prototaxodioid | 2.11 | 480 | 520 |
|  |  | Rhyniophytoid  | 2.15 | 480 | 520 |
|  |  | Rhyniophytoid  | 2.16 | 490 | 530 |
|  |  | Rhyniophytoid  | 2.21 | 490 | 530 |
|  |  | Rhyniophytoid  | 2.22 | 490 | 530 |
|  |  | Prototaxodioid | 2.23 | 490 | 530 |
|  |  | Rhyniophytoid  | 2.23 | 490 | 530 |

|                                                                                                                                            |            |                  |               |                |                  |         |     |
|--------------------------------------------------------------------------------------------------------------------------------------------|------------|------------------|---------------|----------------|------------------|---------|-----|
|                                                                                                                                            |            |                  | Rhyniophytoid | 2.34           | 500              | 540     |     |
|                                                                                                                                            |            |                  | Rhyniophytoid | 2.41           | 500              | 550     |     |
|                                                                                                                                            |            |                  | Rhyniophytoid | 2.71           | 520              | 580     |     |
|                                                                                                                                            |            |                  |               |                |                  |         |     |
|                                                                                                                                            |            |                  | Rhyniophytoid | 2.74           | 520              | 580     |     |
| NORTH BROWN CLEE HILL (Data used in Glasspool et al., 2006) + Prototaxodioid-2022 a new specimen<br>(Prototaxodioid-2022 data in Table S7) |            |                  |               |                |                  |         |     |
| Vitrinite                                                                                                                                  |            |                  | Inertinite    |                |                  | Temp °C |     |
| Id #                                                                                                                                       | Morphology | R <sub>o</sub> % | Id #          | Morphology     | R <sub>o</sub> % | w       | g   |
|                                                                                                                                            | UP         | 0.30             |               | Axis           | 0.67             | 340     | 370 |
|                                                                                                                                            | UP         | 0.40             |               | Pachytheca     | 0.68             | 340     | 380 |
|                                                                                                                                            | UP         | 0.44             |               | Axis           | 0.72             | 340     | 380 |
|                                                                                                                                            | UP         | 0.52             |               | Axis           | 0.74             | 350     | 380 |
|                                                                                                                                            |            |                  |               | Unknown        | 0.75             | 350     | 380 |
|                                                                                                                                            |            |                  |               | Axis           | 0.77             | 350     | 390 |
|                                                                                                                                            |            |                  |               | Axis           | 0.80             | 360     | 390 |
|                                                                                                                                            |            |                  |               | Axis           | 0.82             | 360     | 390 |
|                                                                                                                                            |            |                  |               | Axis           | 0.82             | 360     | 390 |
|                                                                                                                                            |            |                  |               | Axis           | 0.84             | 360     | 390 |
|                                                                                                                                            |            |                  |               | Axis           | 0.89             | 370     | 400 |
|                                                                                                                                            |            |                  |               | Axis           | 0.90             | 370     | 400 |
|                                                                                                                                            |            |                  |               | Axis           | 0.95             | 380     | 400 |
|                                                                                                                                            |            |                  |               | Prototaxodioid | 0.95             | 380     | 400 |
|                                                                                                                                            |            |                  |               | Axis           | 0.95             | 380     | 400 |
|                                                                                                                                            |            |                  |               | Axis           | 0.97             | 380     | 410 |
|                                                                                                                                            |            |                  |               | Axis           | 0.98             | 380     | 410 |
|                                                                                                                                            |            |                  |               | Axis           | 0.99             | 380     | 410 |
|                                                                                                                                            |            |                  |               | Axis           | 1.00             | 380     | 410 |
|                                                                                                                                            |            |                  |               | Axis           | 1.02             | 380     | 410 |
|                                                                                                                                            |            |                  |               | Axis           | 1.02             | 380     | 410 |
|                                                                                                                                            |            |                  |               | Axis           | 1.04             | 390     | 410 |
|                                                                                                                                            |            |                  |               | Prototaxodioid | 1.04             | 390     | 410 |

|  |  |                |      |     |     |
|--|--|----------------|------|-----|-----|
|  |  | Unknown        | 1.04 | 390 | 410 |
|  |  | Prototaxodioid | 1.04 | 390 | 410 |
|  |  | Prototaxodioid | 1.05 | 390 | 410 |
|  |  | Axis           | 1.05 | 390 | 410 |
|  |  | Axis           | 1.06 | 390 | 420 |
|  |  | Axis           | 1.06 | 390 | 420 |
|  |  | Pachythea      | 1.07 | 390 | 420 |
|  |  | Axis           | 1.07 | 390 | 420 |
|  |  | Axis           | 1.10 | 390 | 420 |
|  |  | Axis           | 1.12 | 400 | 420 |
|  |  | Axis           | 1.12 | 400 | 420 |
|  |  | Axis           | 1.15 | 400 | 420 |
|  |  | Axis           | 1.15 | 400 | 420 |
|  |  | Axis           | 1.16 | 400 | 430 |
|  |  | Axis           | 1.16 | 400 | 430 |
|  |  | Prototaxodioid | 1.16 | 400 | 430 |
|  |  | Axis           | 1.17 | 400 | 430 |
|  |  | Axis           | 1.17 | 400 | 430 |
|  |  | Axis           | 1.18 | 400 | 430 |
|  |  | Axis           | 1.19 | 400 | 430 |
|  |  | Axis           | 1.22 | 410 | 430 |
|  |  | Axis           | 1.23 | 410 | 430 |
|  |  | Axis           | 1.24 | 410 | 430 |
|  |  | Axis           | 1.24 | 410 | 430 |
|  |  | Unknown        | 1.27 | 410 | 440 |
|  |  | Axis           | 1.29 | 410 | 440 |
|  |  | Axis           | 1.30 | 420 | 440 |
|  |  | Axis           | 1.31 | 420 | 440 |
|  |  | Axis           | 1.32 | 420 | 440 |
|  |  | Axis           | 1.38 | 420 | 450 |
|  |  | Axis           | 1.40 | 430 | 450 |
|  |  | Axis           | 1.41 | 430 | 450 |
|  |  | Pachythea      | 1.46 | 430 | 460 |

|  |  |                     |      |     |     |
|--|--|---------------------|------|-----|-----|
|  |  | Unknown             | 1.52 | 440 | 460 |
|  |  | Axis                | 1.55 | 440 | 460 |
|  |  | Axis                | 1.63 | 450 | 470 |
|  |  | Axis                | 1.96 | 470 | 510 |
|  |  | Axis                | 2.04 | 480 | 510 |
|  |  | Prototaxodioid      | 2.04 | 480 | 510 |
|  |  | Unknown             | 2.12 | 480 | 520 |
|  |  | Axis                | 2.17 | 490 | 530 |
|  |  | Pachythea           | 2.32 | 490 | 540 |
|  |  | Pachythea           | 2.47 | 500 | 560 |
|  |  | Prototaxodioid      | 2.51 | 510 | 560 |
|  |  | Unknown             | 2.61 | 510 | 570 |
|  |  | Pachythea           | 3.07 | 530 | 620 |
|  |  | Prototaxodioid      | 3.45 | 550 | 660 |
|  |  | Pachythea           | 4.14 | 590 | 740 |
|  |  | Pachythea           | 4.40 | 610 | 770 |
|  |  | Pachythea           | 4.41 | 610 | 770 |
|  |  | Pachythea           | 4.43 | 610 | 770 |
|  |  | Prototaxodioid      | 4.54 | 620 | 790 |
|  |  | Prototaxodioid      | 4.61 | 620 | 790 |
|  |  | Prototaxodioid-2022 | 5.82 | 760 | 970 |

**Table S6.** Summary of the mean, minimum, and maximum charring temperatures (°C) calculated from the Winnica and Rumney Borehole data in Table S5. The two sets of summary data (w and g) represent the application of **Equation 1** based upon modern woods and **Equation 2** based upon the modern bracket fungus *Ganoderma*.

|                                        |                                               | Rumney Borehole<br>~430 Ma |       |       | Winnica<br>~424 Ma |       |       | Ludford Lane<br>~423 Ma |       |       | North Brown Clee Hill<br>~419 Ma |       |       |
|----------------------------------------|-----------------------------------------------|----------------------------|-------|-------|--------------------|-------|-------|-------------------------|-------|-------|----------------------------------|-------|-------|
| Reflectance Ro % (Calc. from Table S5) |                                               | Mean                       | Min   | Max   | Mean               | Min   | Max   | Mean                    | Min   | Max   | Mean                             | Min   | Max   |
|                                        |                                               | 2.31                       | 1.27  | 5.61  | 2.06               | 1.15  | 4.78  | 1.67                    | 1.03  | 2.74  | 1.60                             | 0.67  | 5.82  |
| Charring Calibration Equation ( y = )  |                                               | Temp. (°C)                 |       |       | Temp. (°C)         |       |       | Temp. (°C)              |       |       | Temp. (°C)                       |       |       |
|                                        |                                               | Mean                       | Min   | Max   | Mean               | Min   | Max   | Mean                    | Min   | Max   | Mean                             | Min   | Max   |
| Equation 1 (combined)                  | (5.3103*(x3))-(50.454*(x2))+(206.87*x)+220.17 | w-490                      | w-410 | w-730 | w-480              | w-400 | w-640 | w-450                   | w-390 | w-520 | w-440                            | w-340 | w-760 |
| Equation 2 ( <i>Ganoderma</i> )        | (1.5242*(x3))-(9.0073*(x2))+(116.22*x)+300.66 | g-540                      | g-440 | g-940 | g-520              | g-420 | g-820 | g-480                   | g-410 | g-580 | g-470                            | g-370 | g-970 |

**Table S7.** Reflectance (Ro %) data measured in 2022 from an additional prototaxodioid specimen from North Brown Clee Hill. The calibration curve for conversion from raw grey scale values to Ro % is given.

| Calibration data for<br>North Brown Clee Hill<br>Prototaxodioid-2022 |       |        |       |  | North Brown Clee Hill<br>Prototaxodioid-2022<br>(1 Specimen) | Grey<br>Scale | Ro % |
|----------------------------------------------------------------------|-------|--------|-------|--|--------------------------------------------------------------|---------------|------|
|                                                                      | Ro %  | Value  | Ro %  |  | Mean                                                         |               | 5.82 |
| SiC                                                                  | 7.380 | 180.61 | 7.38  |  | Min                                                          |               | 5.02 |
| STit                                                                 | 5.410 | 132.3  | 5.41  |  | Max                                                          |               | 6.77 |
| CZ                                                                   | 3.140 | 78.01  | 3.14  |  |                                                              |               |      |
| GGG                                                                  | 1.728 | 43.05  | 1.728 |  | Image 1 Loc 1                                                | 147.37        | 6.02 |
|                                                                      |       |        |       |  | Image 1 Loc 2                                                | 157.33        | 6.43 |
|                                                                      |       |        |       |  | Image 1 Loc 3                                                | 138.04        | 5.63 |
|                                                                      |       |        |       |  | Image 1 Loc 4                                                | 142.37        | 5.81 |
|                                                                      |       |        |       |  | Image 1 Loc 5                                                | 133.25        | 5.44 |
|                                                                      |       |        |       |  | Image 2 Loc 1                                                | 146.20        | 5.97 |
|                                                                      |       |        |       |  | Image 2 Loc 2                                                | 141.36        | 5.77 |
|                                                                      |       |        |       |  | Image 2 Loc 3                                                | 147.08        | 6.01 |
|                                                                      |       |        |       |  | Image 2 Loc 4                                                | 138.04        | 5.63 |
|                                                                      |       |        |       |  | Image 2 Loc 5                                                | 147.44        | 6.02 |
|                                                                      |       |        |       |  | Image 3 Loc 1                                                | 142.98        | 5.84 |
|                                                                      |       |        |       |  | Image 3 Loc 2                                                | 141.29        | 5.77 |
|                                                                      |       |        |       |  | Image 3 Loc 3                                                | 130.98        | 5.34 |
|                                                                      |       |        |       |  | Image 3 Loc 4                                                | 141.61        | 5.78 |
|                                                                      |       |        |       |  | Image 3 Loc 5                                                | 139.56        | 5.70 |
|                                                                      |       |        |       |  | Image 4 Loc 1                                                | 143.34        | 5.85 |
|                                                                      |       |        |       |  | Image 4 Loc 2                                                | 147.76        | 6.03 |
|                                                                      |       |        |       |  | Image 4 Loc 3                                                | 144.21        | 5.89 |
|                                                                      |       |        |       |  | Image 4 Loc 4                                                | 158.35        | 6.47 |
|                                                                      |       |        |       |  | Image 4 Loc 5                                                | 158.84        | 6.49 |
|                                                                      |       |        |       |  | Image 5 Loc 1                                                | 158.76        | 6.49 |

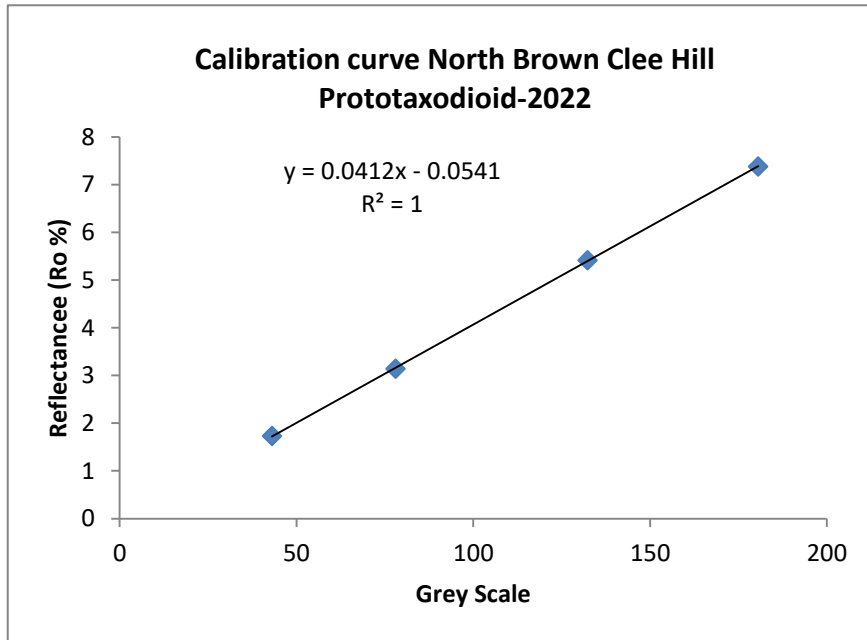

|                |        |      |
|----------------|--------|------|
| Image 5 Loc 2  | 141.27 | 5.77 |
| Image 5 Loc 3  | 145.81 | 5.95 |
| Image 5 Loc 4  | 151.25 | 6.18 |
| Image 5 Loc 5  | 163.41 | 6.68 |
| Image 6 Loc 1  | 154.18 | 6.30 |
| Image 6 Loc 2  | 140.80 | 5.75 |
| Image 6 Loc 3  | 151.85 | 6.20 |
| Image 6 Loc 4  | 140.06 | 5.72 |
| Image 6 Loc 5  | 149.00 | 6.08 |
| Image 7 Loc 1  | 147.34 | 6.02 |
| Image 7 Loc 2  | 141.45 | 5.77 |
| Image 7 Loc 3  | 138.04 | 5.63 |
| Image 7 Loc 4  | 141.82 | 5.79 |
| Image 7 Loc 5  | 153.32 | 6.26 |
| Image 8 Loc 1  | 146.00 | 5.96 |
| Image 8 Loc 2  | 149.97 | 6.12 |
| Image 8 Loc 3  | 146.51 | 5.98 |
| Image 8 Loc 4  | 148.72 | 6.07 |
| Image 8 Loc 5  | 151.34 | 6.18 |
| Image 9 Loc 1  | 140.76 | 5.75 |
| Image 9 Loc 2  | 138.52 | 5.65 |
| Image 9 Loc 3  | 137.32 | 5.60 |
| Image 9 Loc 4  | 147.49 | 6.02 |
| Image 9 Loc 5  | 158.83 | 6.49 |
| Image 10 Loc 1 | 147.95 | 6.04 |
| Image 10 Loc 2 | 153.88 | 6.29 |
| Image 10 Loc 3 | 143.77 | 5.87 |
| Image 10 Loc 4 | 165.60 | 6.77 |
| Image 10 Loc 5 | 152.45 | 6.23 |
| Image 11 Loc 1 | 133.05 | 5.43 |
| Image 11 Loc 2 | 142.17 | 5.80 |

|                |        |      |
|----------------|--------|------|
| Image 11 Loc 3 | 139.51 | 5.69 |
| Image 11 Loc 4 | 139.26 | 5.68 |
| Image 11 Loc 5 | 146.14 | 5.97 |
| Image 12 Loc 1 | 139.76 | 5.70 |
| Image 12 Loc 2 | 140.55 | 5.74 |
| Image 12 Loc 3 | 134.85 | 5.50 |
| Image 12 Loc 4 | 133.29 | 5.44 |
| Image 12 Loc 5 | 132.83 | 5.42 |
| Image 13 Loc 1 | 127.52 | 5.20 |
| Image 13 Loc 2 | 128.53 | 5.24 |
| Image 13 Loc 3 | 143.32 | 5.85 |
| Image 13 Loc 4 | 140.50 | 5.73 |
| Image 13 Loc 5 | 152.60 | 6.23 |
| Image 14 Loc 1 | 133.00 | 5.43 |
| Image 14 Loc 2 | 143.38 | 5.85 |
| Image 14 Loc 3 | 136.30 | 5.56 |
| Image 14 Loc 4 | 136.87 | 5.58 |
| Image 14 Loc 5 | 139.54 | 5.69 |
| Image 15 Loc 1 | 140.77 | 5.75 |
| Image 15 Loc 2 | 137.38 | 5.61 |
| Image 15 Loc 3 | 143.89 | 5.87 |
| Image 15 Loc 4 | 142.02 | 5.80 |
| Image 15 Loc 5 | 123.10 | 5.02 |
| Image 16 Loc 1 | 134.88 | 5.50 |
| Image 16 Loc 2 | 131.86 | 5.38 |
| Image 16 Loc 3 | 129.39 | 5.28 |
| Image 16 Loc 4 | 139.24 | 5.68 |
| Image 16 Loc 5 | 141.72 | 5.78 |
| Image 17 Loc 1 | 139.91 | 5.71 |
| Image 17 Loc 2 | 136.52 | 5.57 |
| Image 17 Loc 3 | 135.76 | 5.54 |



|                |        |      |
|----------------|--------|------|
| Image 17 Loc 4 | 128.13 | 5.22 |
| Image 17 Loc 5 | 138.06 | 5.63 |
| Image 18 Loc 1 | 133.76 | 5.46 |
| Image 18 Loc 2 | 150.89 | 6.16 |
| Image 18 Loc 3 | 128.54 | 5.24 |
| Image 18 Loc 4 | 128.57 | 5.24 |
| Image 18 Loc 5 | 140.49 | 5.73 |
| Image 19 Loc 1 | 142.45 | 5.81 |
| Image 19 Loc 2 | 140.62 | 5.74 |
| Image 19 Loc 3 | 136.00 | 5.55 |
| Image 19 Loc 4 | 140.94 | 5.75 |
| Image 19 Loc 5 | 128.06 | 5.22 |
| Image 20 Loc 1 | 154.62 | 6.32 |
| Image 20 Loc 2 | 152.48 | 6.23 |
| Image 20 Loc 3 | 146.98 | 6.00 |
| Image 20 Loc 4 | 145.25 | 5.93 |
| Image 20 Loc 5 | 139.24 | 5.68 |

**Table S8.** Regional rank maturation data from Bullock et al., (2019).

| Colliery/Coalfield  | Reflectance (R <sub>o</sub> %) | Proximity to Rumney |
|---------------------|--------------------------------|---------------------|
| Wylie               | 1.14                           | ~16 km north-west   |
| Llanilid            | 1.07                           | ~24 km west         |
| Midsomer Norton     | 1.06                           | ~52 km south-east   |
| Cattybrook          | 0.87                           | ~38 km east.        |
| Cynheidre coalfield | 3.29                           | ~78 km north-west   |
